# Supplementary material for: Synthetic Route to Conjugated Donor–Acceptor Polymer Brushes via Alternating Copolymerization of Bifunctional Monomers
Source: MDPI journal article supplement (doi:10.3390/polym14132735), 2022-07-04
Supplement: s1 [file s1]

# Synthetic route to conjugated donor-acceptor polymer brushes via alternating copolymerization of bifunctional monomers

Anna Grobelny <sup>1</sup>, Karolina Lorenc <sup>1</sup>, Łucja Skowron <sup>1</sup> and Szczepan Zapotoczny <sup>1,\*</sup>

## SUPPORTING INFORMATION

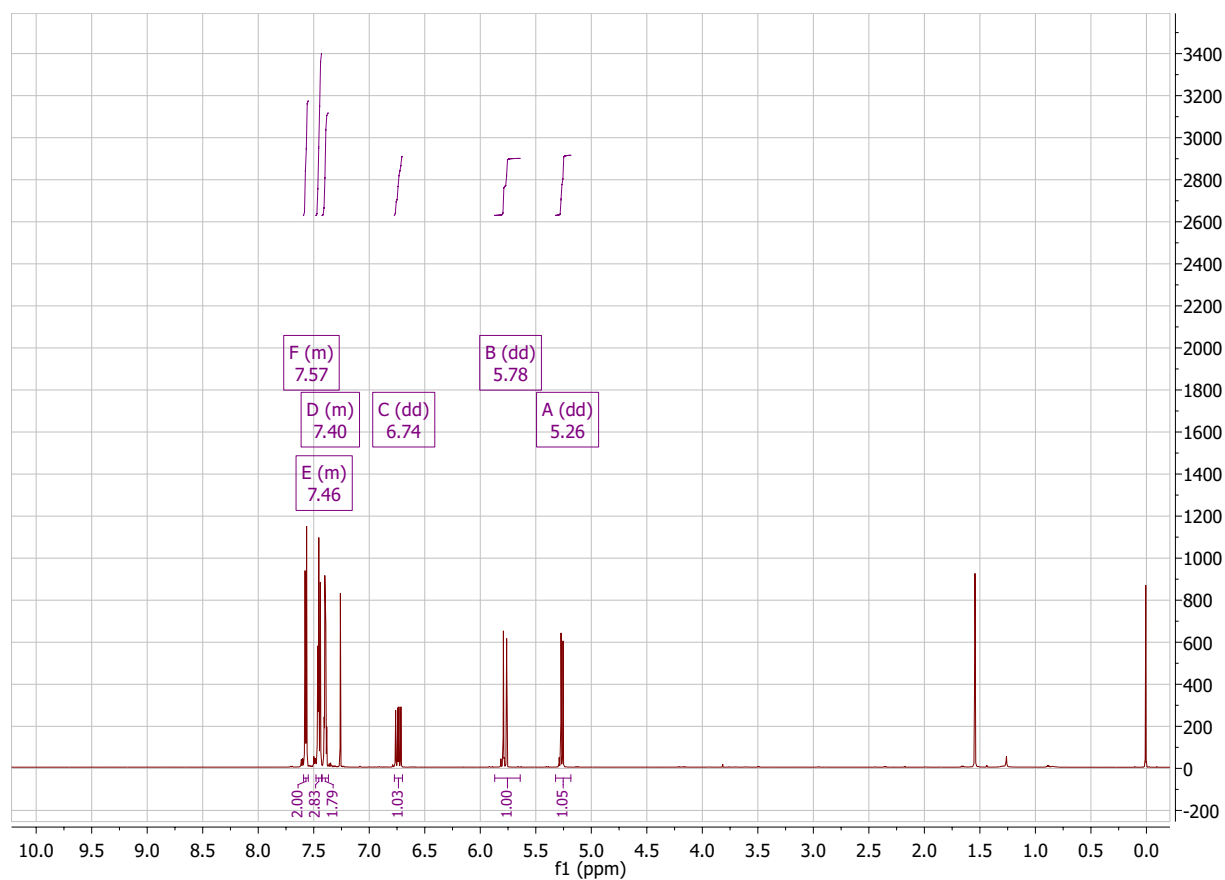

**Figure S1.** The <sup>1</sup>H NMR spectrum of synthesized donor **St-D** monomer.

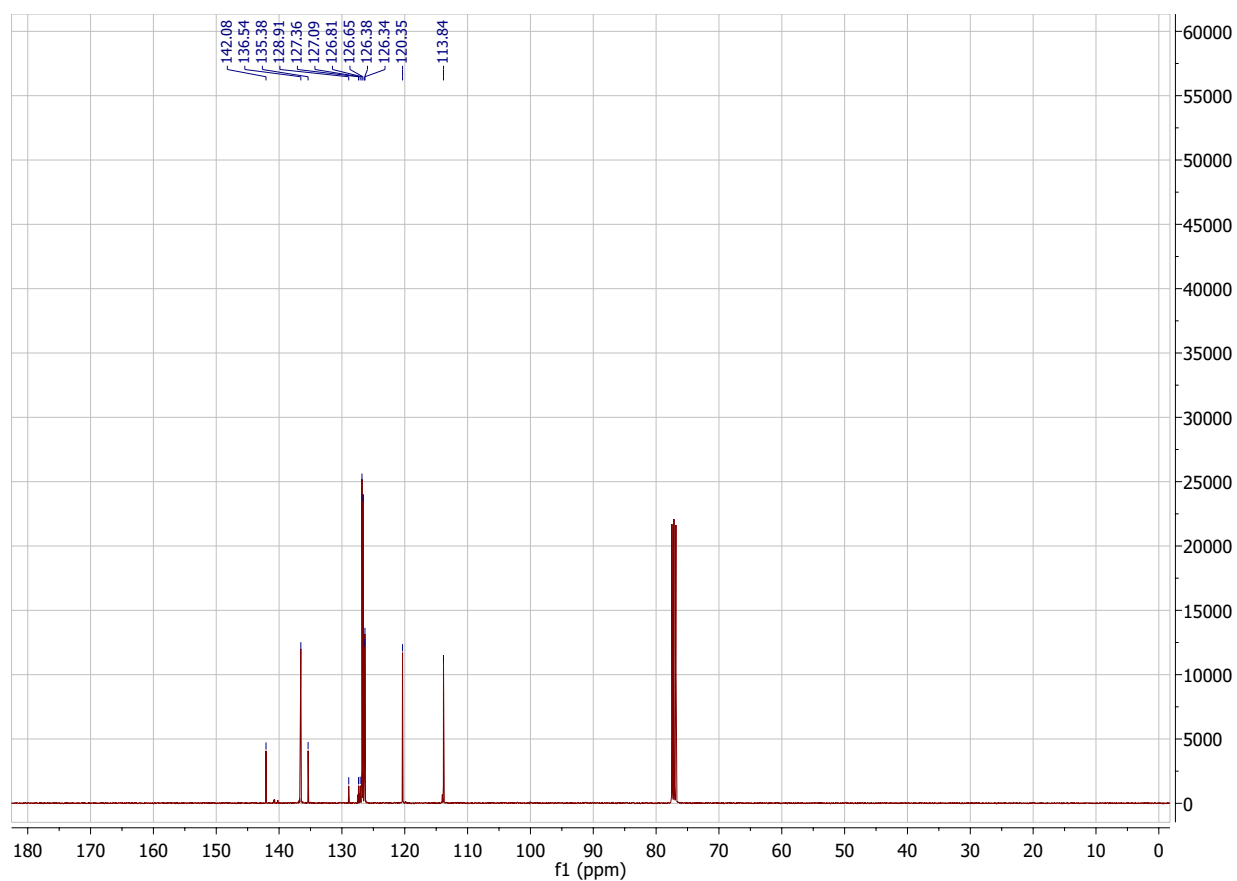

**Figure S2.** The  $^{13}\text{C}$  NMR spectrum of synthesized donor **St-D** monomer.

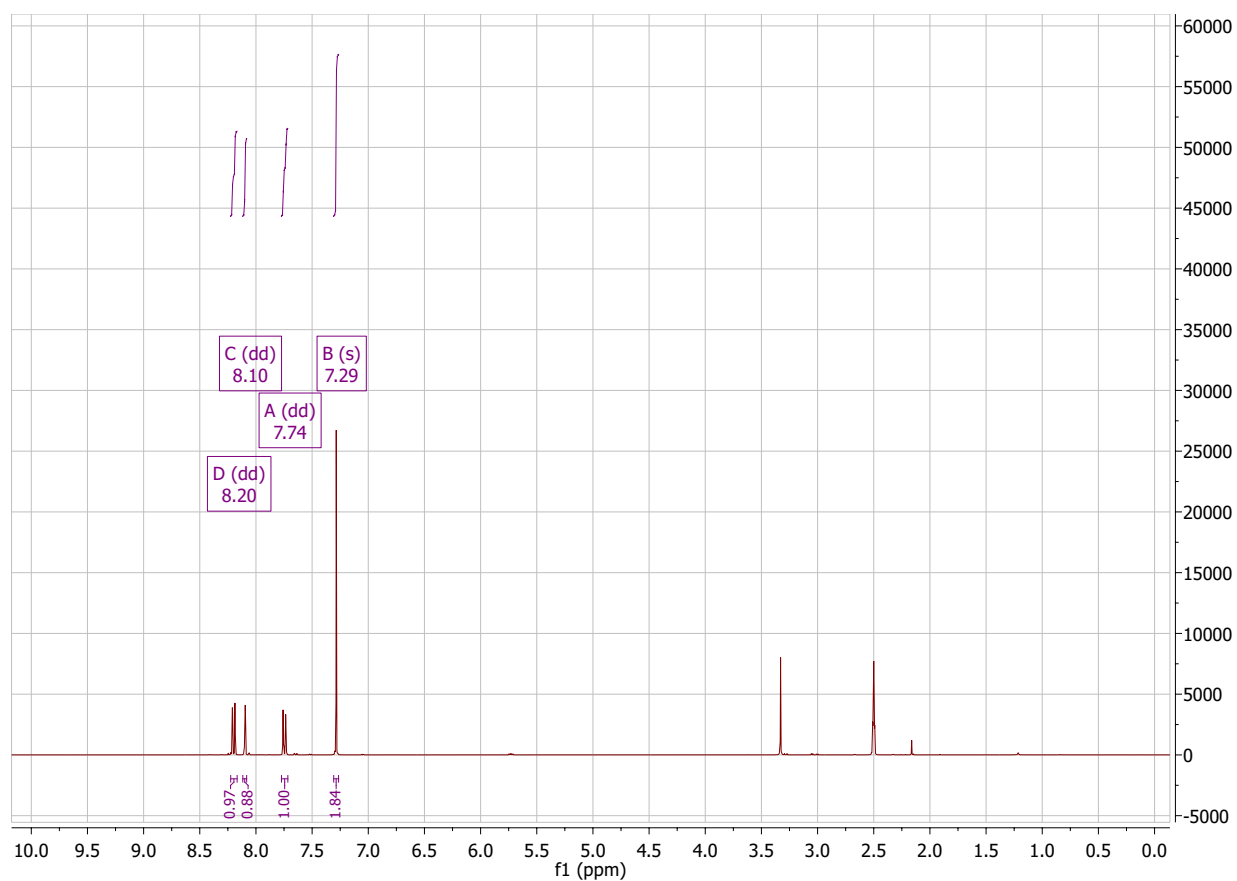

**Figure S3.** The  $^1\text{H}$  NMR spectrum of synthesized acceptor **Ma-A** monomer.

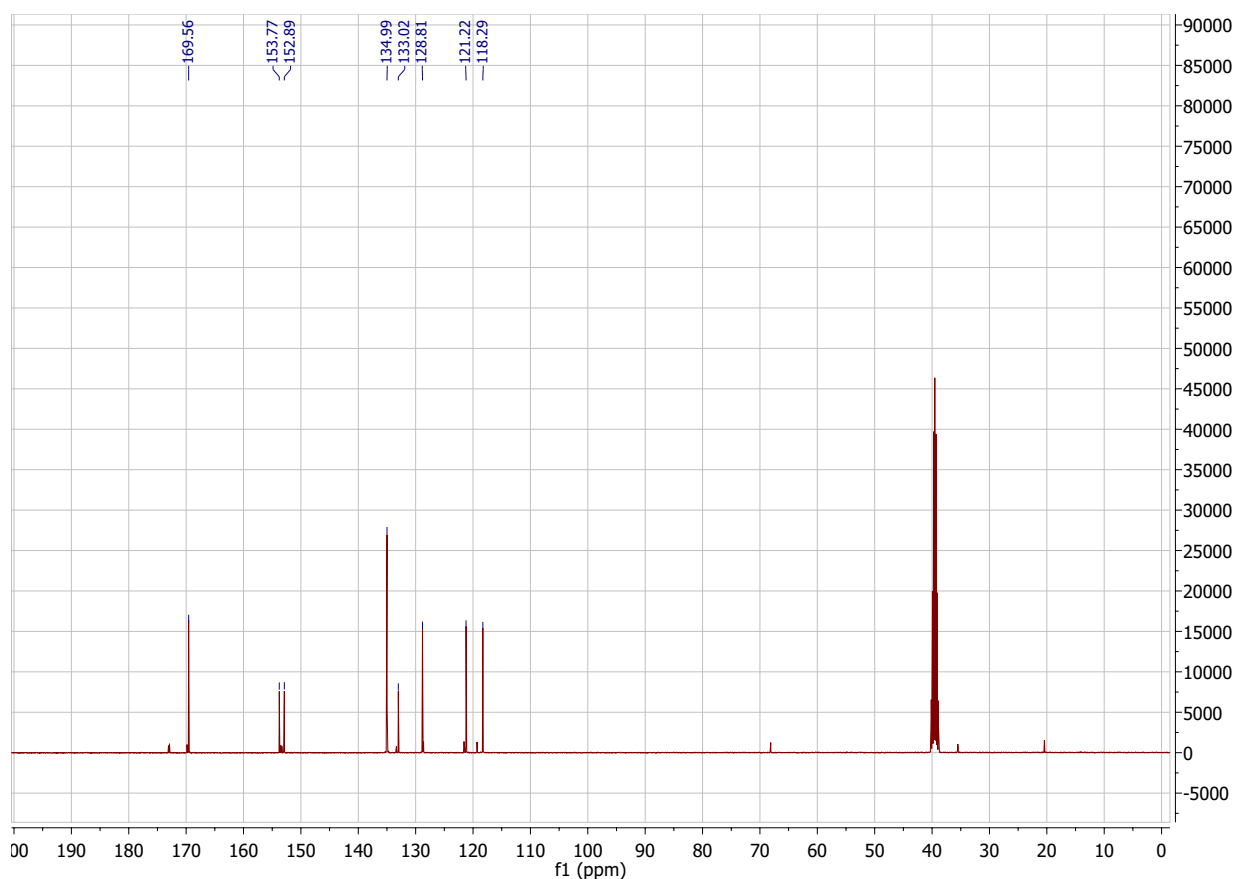

**Figure S4.** The  $^{13}\text{C}$  NMR spectrum of synthesized acceptor **Ma-A** monomer.

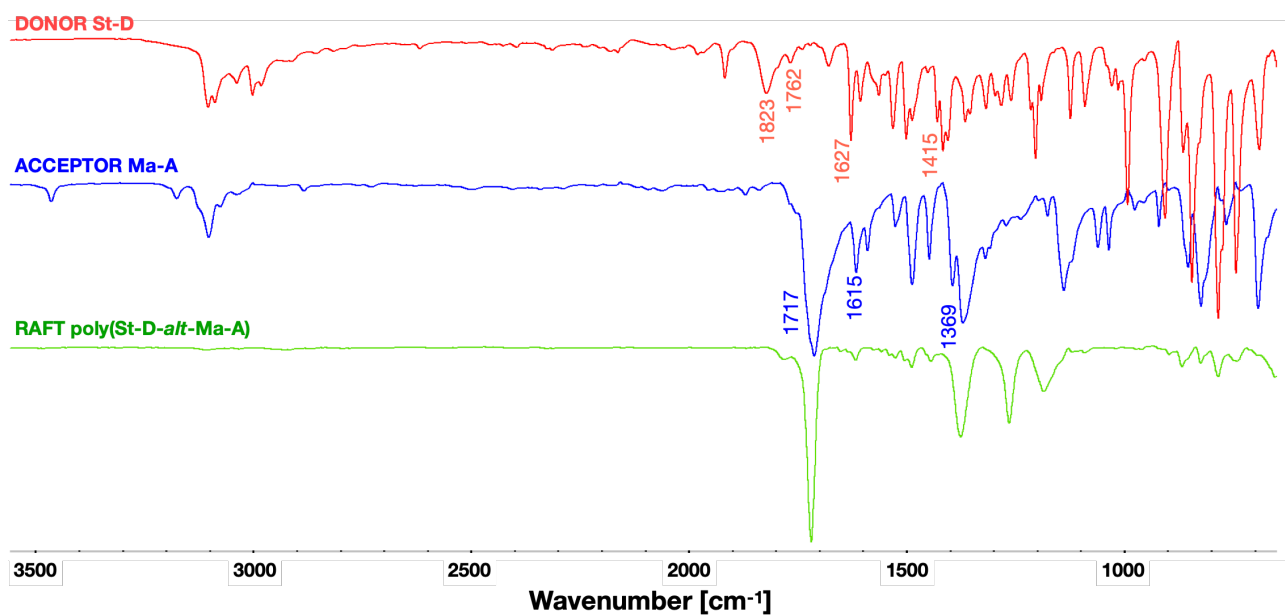

**Figure S5.** The IR transmittance spectra of synthesized donor and acceptor monomers, as well as the polymer brushes obtained via surface-initiated RAFT polymerization.

Donor (**St-D**): 1415  $\text{cm}^{-1}$  (C=C stretching vibrations in thiophene ring), 1627  $\text{cm}^{-1}$  (C=C stretching vibrations), 1823 and 1762  $\text{cm}^{-1}$  (C=C overtones of stretching vibrations in benzene ring);

Acceptor (**Ma-A**): 1369  $\text{cm}^{-1}$  (C=N stretching vibrations in benzo[c][1,2,5]thiadiazol ring), 1615  $\text{cm}^{-1}$  (C=C stretching vibrations), 1717  $\text{cm}^{-1}$  (C=O stretching vibrations in carbonyl group).

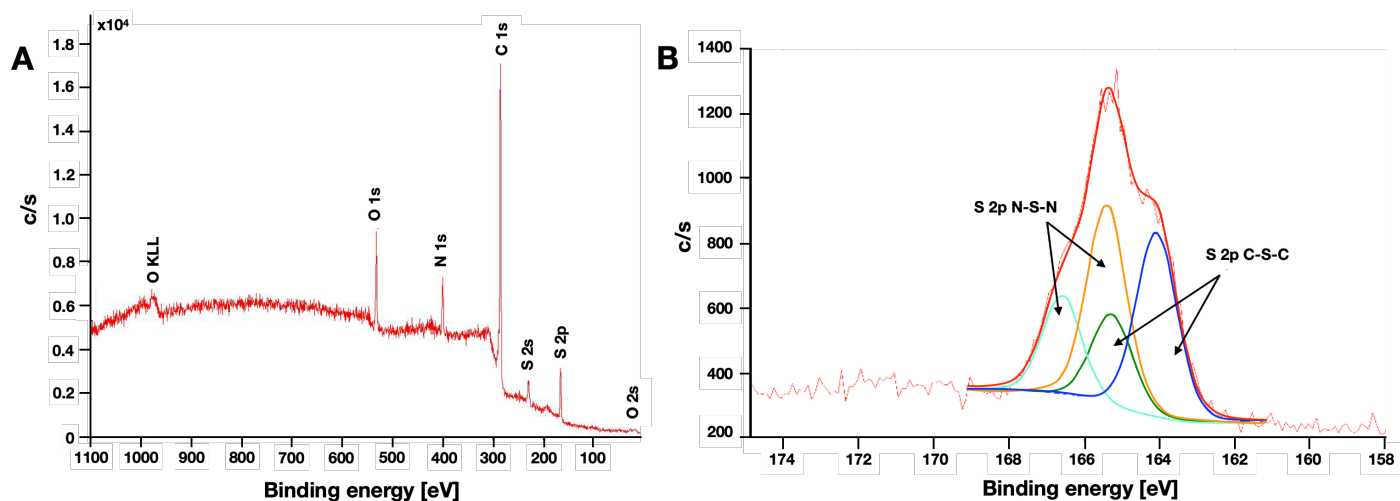

Figure S6. The XPS spectrum of (A) poly(St-D-*alt*-Ma-A) brushes obtained via RAFT polymerization and (B) sulfur region.

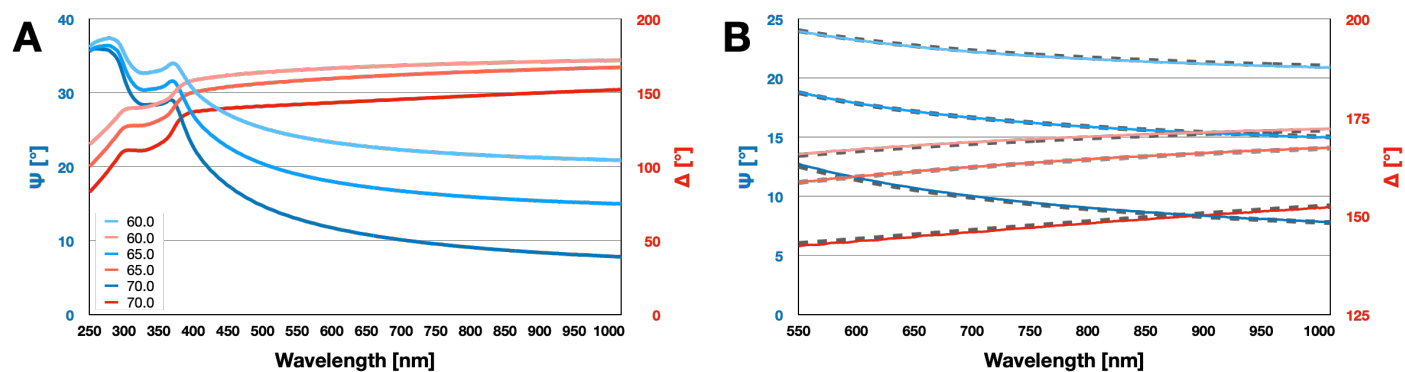

Figure S7. Exemplary spectroscopic ellipsometry data for the polymer brushes obtained via RAFT polymerization (A) and their fits to the Cauchy model (B).

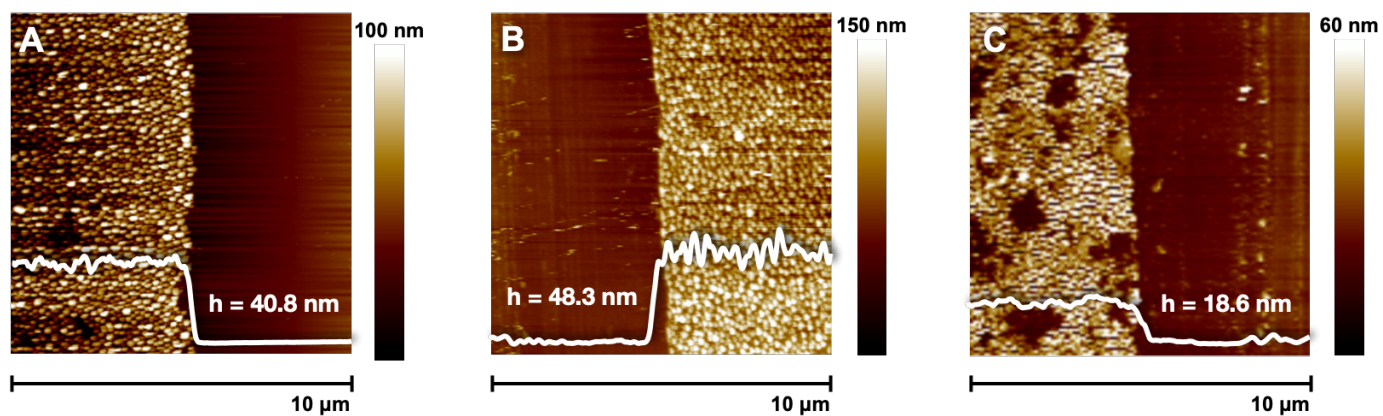

Figure S8. AFM pictures of poly(St-D-*alt*-Ma-A) brushes obtained via RAFT polymerization with various grafting densities: (A) 100% (B) 80% and (C) 70%.

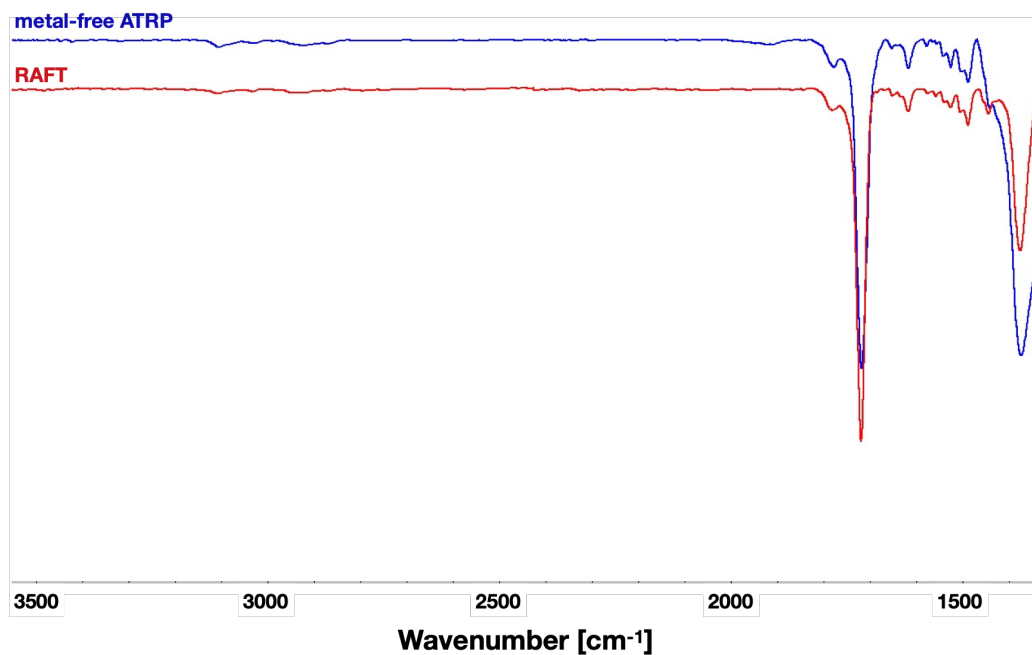

**Figure S9.** The IR transmittance spectra (1300 – 3500  $\text{cm}^{-1}$ ) of poly(**St-D-alt-Ma-A**) brushes obtained via RAFT and metal-free ATRP (the spectra at wavenumbers below 1300  $\text{cm}^{-1}$  contain some artefacts related to the ITO substrates and are not comparable).

**Table S1.** Thickness of donor-acceptor brushes obtained during various time of metal-free ATRP polymerization

| Polymerization time<br>[h] | Brush thickness based on<br>spectroscopic ellipsometry<br>[nm] | Brush thickness based on<br>AFM<br>[nm] |
|----------------------------|----------------------------------------------------------------|-----------------------------------------|
| 0.75                       | $3.5 \pm 0.0$                                                  | -                                       |
| 1.50                       | $5.8 \pm 0.1$                                                  | $5.1 \pm 0.1$                           |
| 3.00                       | $8.5 \pm 0.1$                                                  | $9.8 \pm 0.1$                           |
| 4.00                       | $13.5 \pm 1.2$                                                 | $13.4 \pm 0.2$                          |
| 6.00                       | $22.9 \pm 0.3$                                                 | $26.9 \pm 0.6$                          |

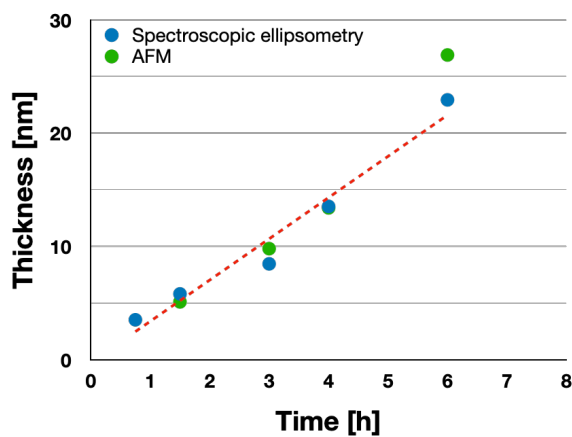

**Figure S10.** The relationship between thickness of donor-acceptor poly(**St-D-alt-Ma-A**) brushes and time of metal-free ATRP polymerization.

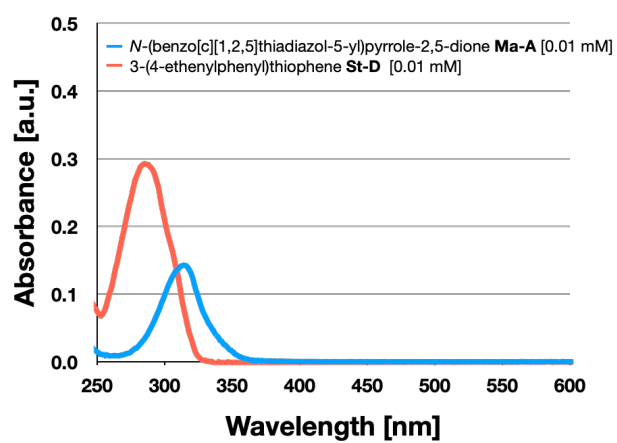

**Figure S11.** UV-Vis absorption spectra of the monomers used to synthesis of donor-acceptor polymer brushes. Solutions of both compounds are prepared in dioxane.
